# Supplementary material for: Single-Stage Extraction and Separation of Co2+ from Ni2+ Using Ionic Liquid of [C4H9NH3][Cyanex 272]
Source: MDPI journal article supplement (doi:10.3390/molecules27154806), 2022-07-27
Supplement: s1 [file s1]

## Supplementary materials

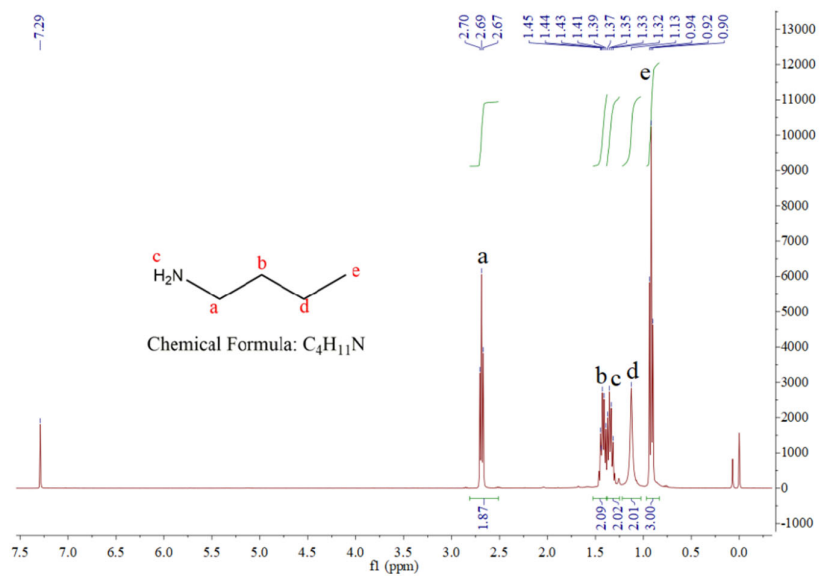

Figure S1.  $^1H$  NMR of  $C_4H_9NH_2$ .

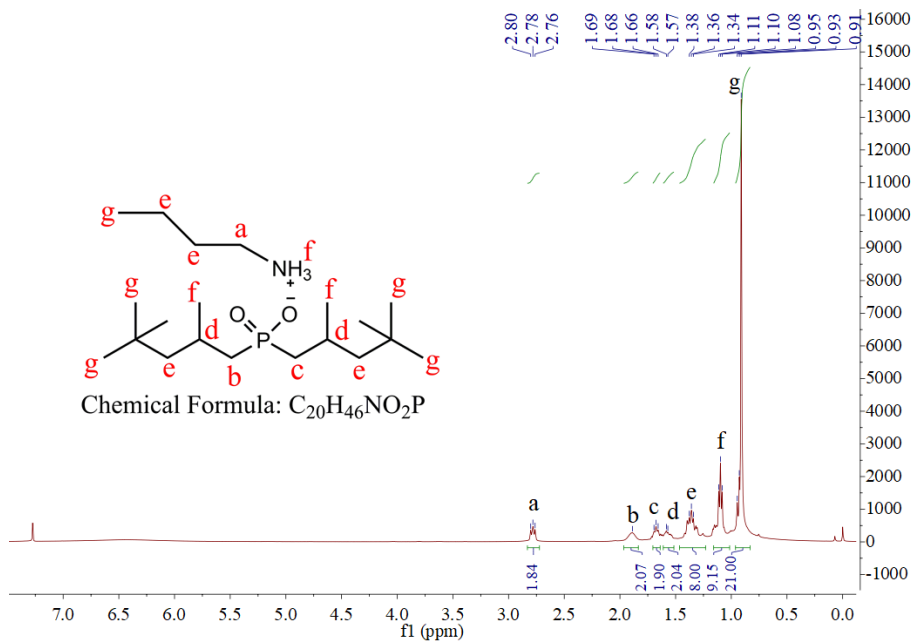

Figure S2.  $^1H$  NMR of  $[C_4H_9NH_3][Cyanex\ 272]$ .

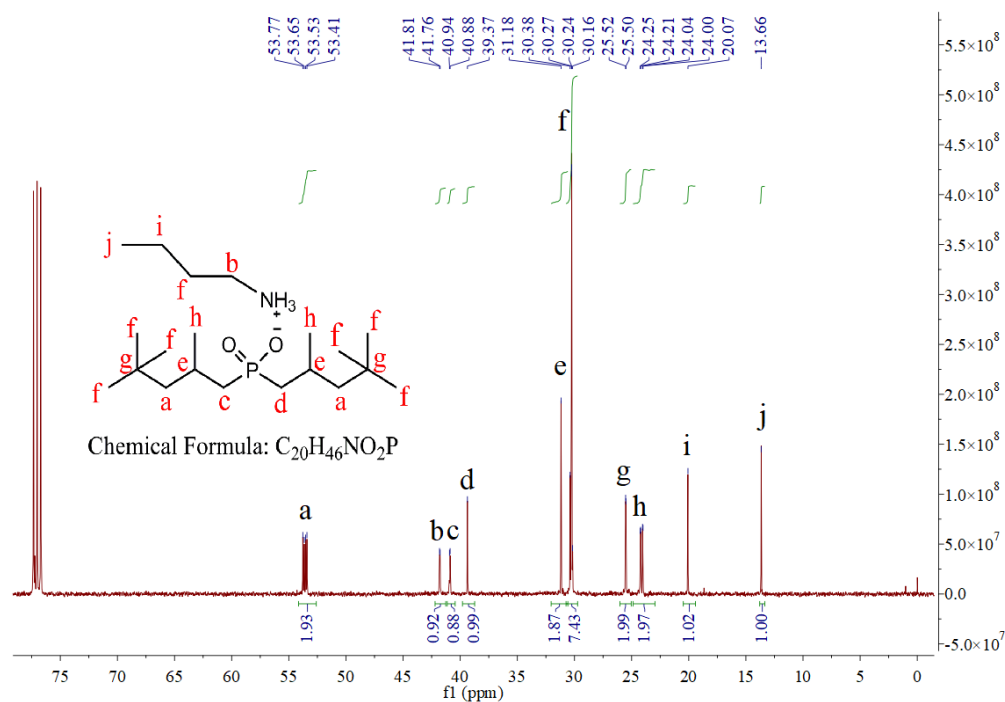

Figure S3.  $^{13}C$  NMR of  $[C_4H_9NH_3][Cyanex\ 272]$ .

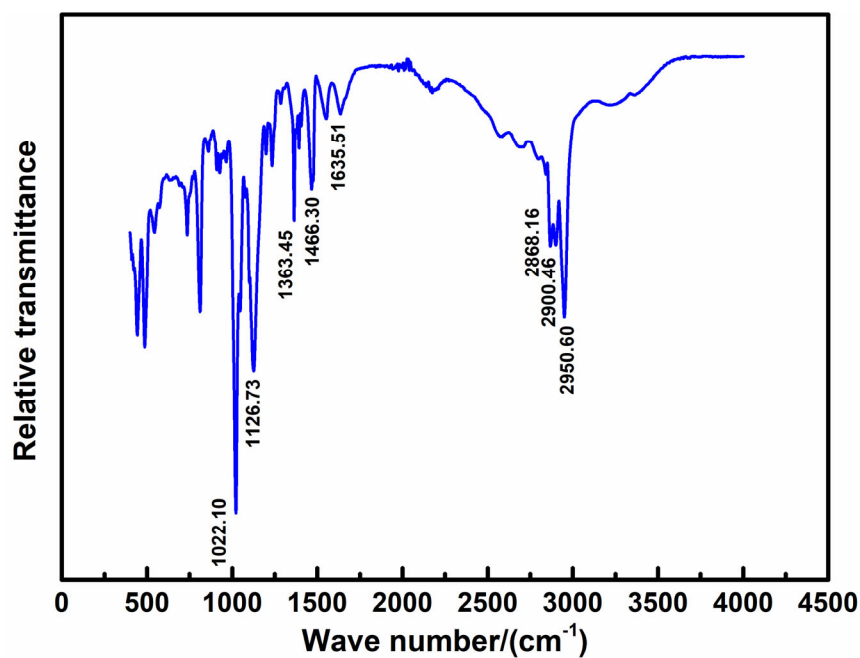

Figure S4. FT-IR of  $[C_4H_9NH_3][Cyanex\ 272]$ .

N-butylamine ( $C_4H_9NH_2$ )

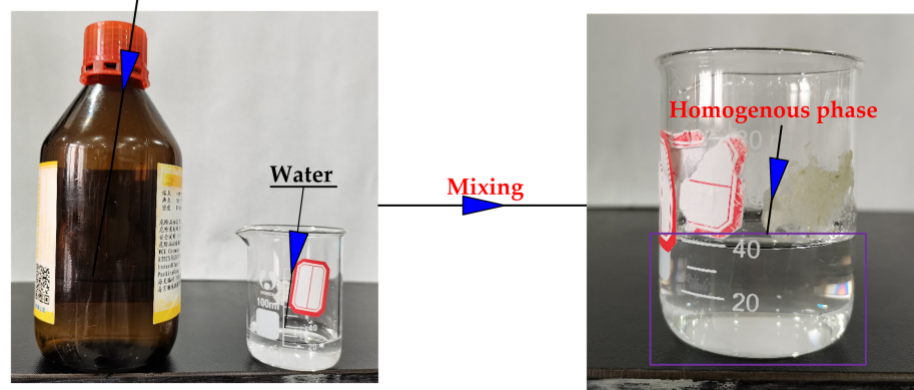

Figure S5. Homogenous phase of mixing of  $C_4H_9NH_2$  and Water.

$[C_4H_9NH_3][Cyanex\ 272]$

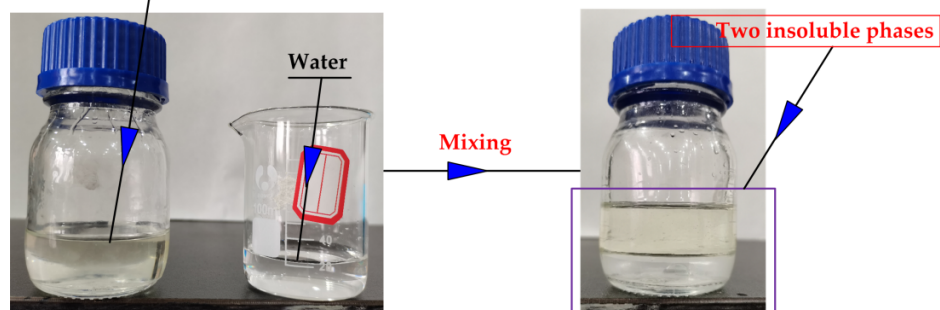

Figure S6. Two insoluble phases of mixing of  $[C_4H_9NH_3][Cyanex\ 272]$  and Water.
